# Supplementary material for: Template-free synthesis of 3D hierarchical nanostructured NiCo2O4mesoporous ultrathin nanosheet hollow microspheres for excellent methanol electrooxidation and supercapacitors
Source: Royal Society of Chemistry journal article supplement (doi:10.1039/c6ra01939k), 2016-01-01
Supplement: c6ra01939k1.pdf [file c6ra01939k1.pdf]

## SUPPORTING INFORMATION

**Template-free synthesis of 3D hierarchical nanostructured NiCo<sub>2</sub>O<sub>4</sub> mesoporous ultrathin nanosheets hollow microspheres for excellent methanol electrooxidation and supercapacitors**

Gaowen Chen, Yizhi Gao and Hui Zhang\*

*State Key Laboratory of Chemical Resource Engineering, Beijing University of Chemical Technology, P.O. Box 98, Beijing 100029, China.*

*Email: [huizhang67@gst21.com](mailto:huizhang67@gst21.com);*

*Fax: +8610-6442 5385;*

*Tel.: +8610-6442 5872*

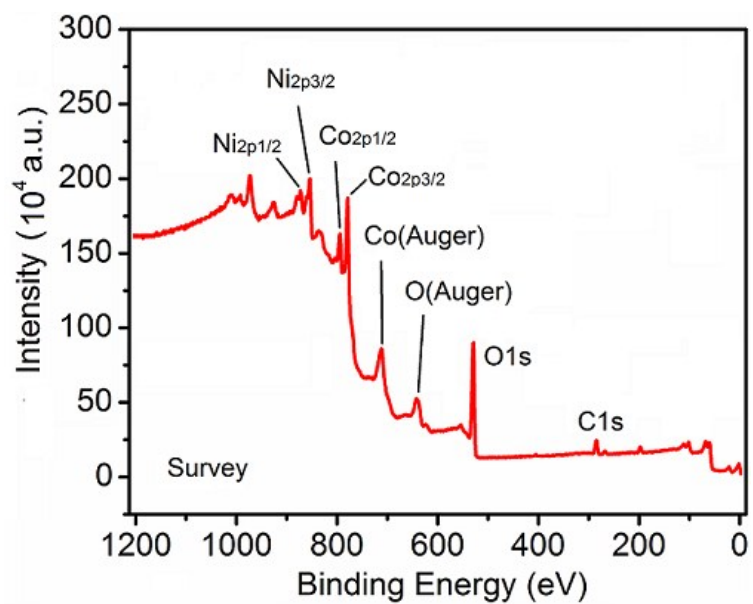

**Fig. S1** XPS survey scan of the H-NiCo<sub>2</sub>O<sub>4</sub>.

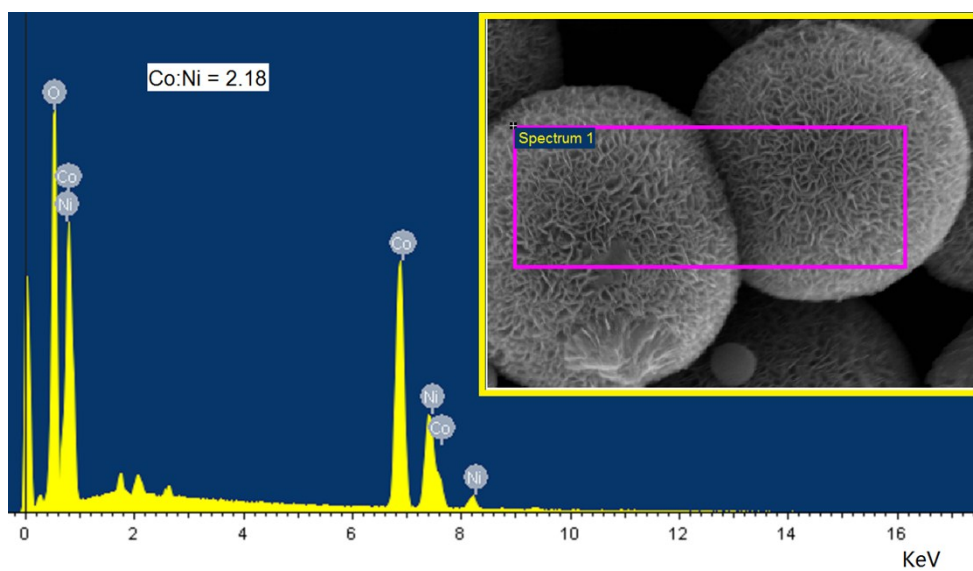

**Fig. S2.** EDX image of H-NiCo<sub>2</sub>O<sub>4</sub>.

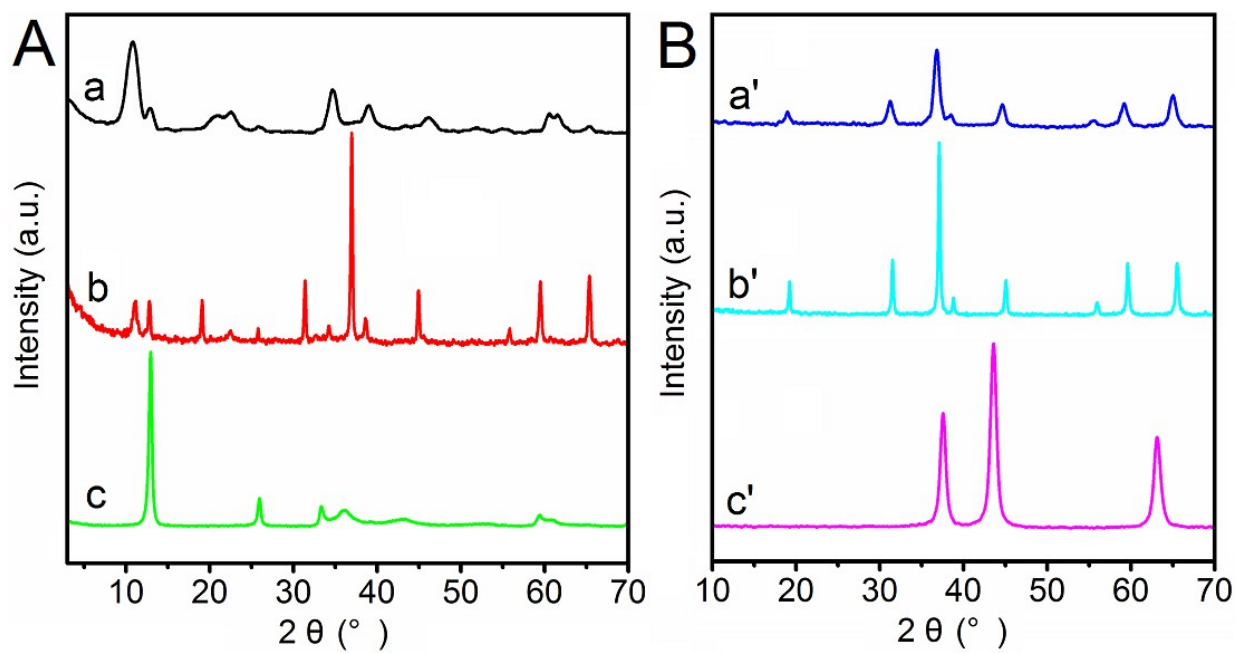

**Fig. S3.** XRD patterns of the precursors (A: S-NiCo-pre (a), Co-pre (b), Ni-pre (c) and calcined products (B: S-NiCo<sub>2</sub>O<sub>4</sub> (a'), Co<sub>3</sub>O<sub>4</sub> (b'), and NiO (c')).

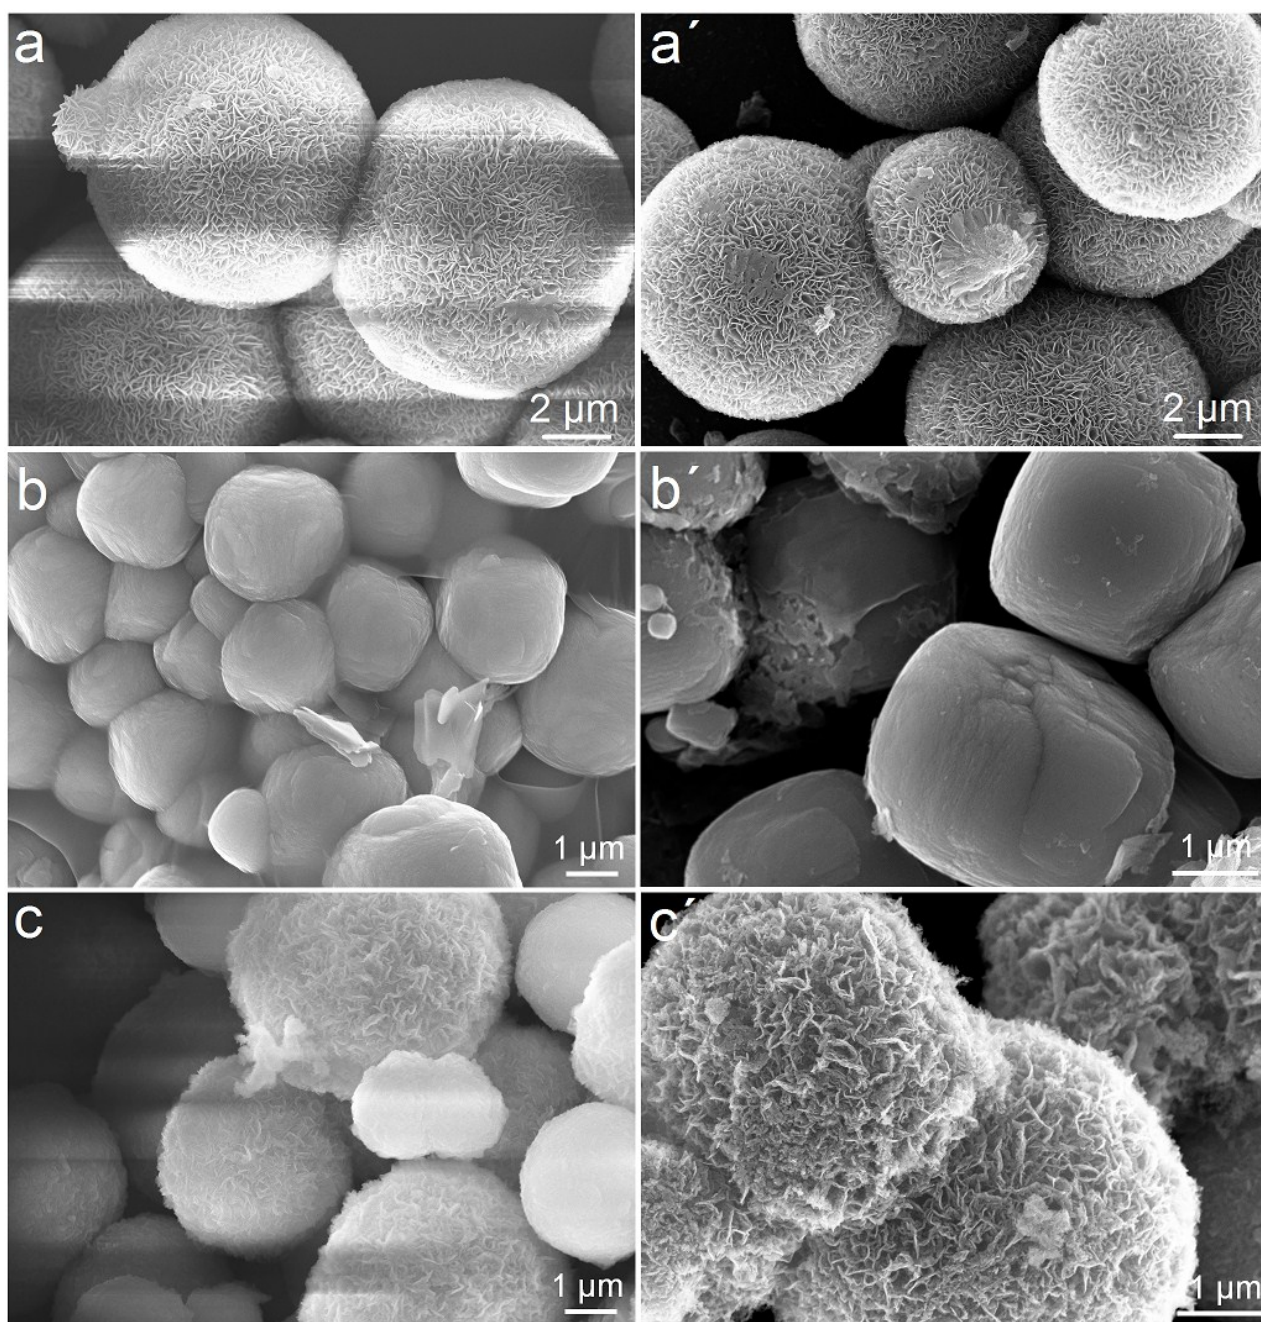

**Fig. S4.** SEM images of S-NiCo-pre (a), S-NiCo<sub>2</sub>O<sub>4</sub> (a'), Co-pre (b), Co<sub>3</sub>O<sub>4</sub>(b'), Ni-pre (c) and NiO (c').



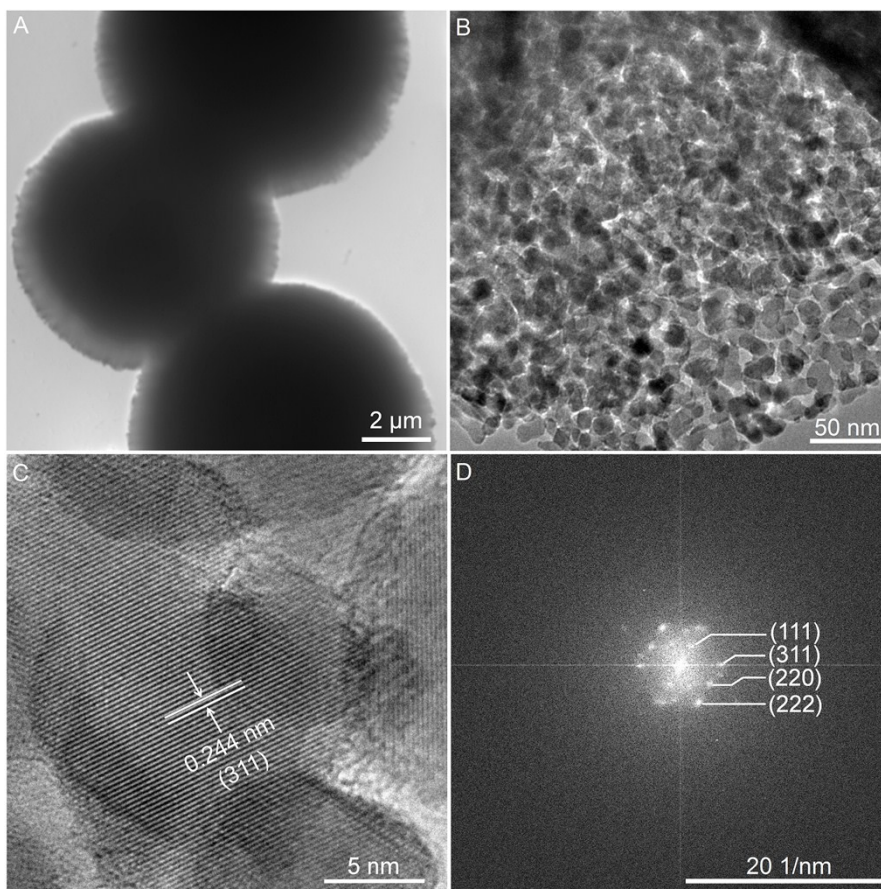

**Fig. S5.** TEM (A), HRTEM (B, C) and SAED (D) images of S-NiCo<sub>2</sub>O<sub>4</sub>.

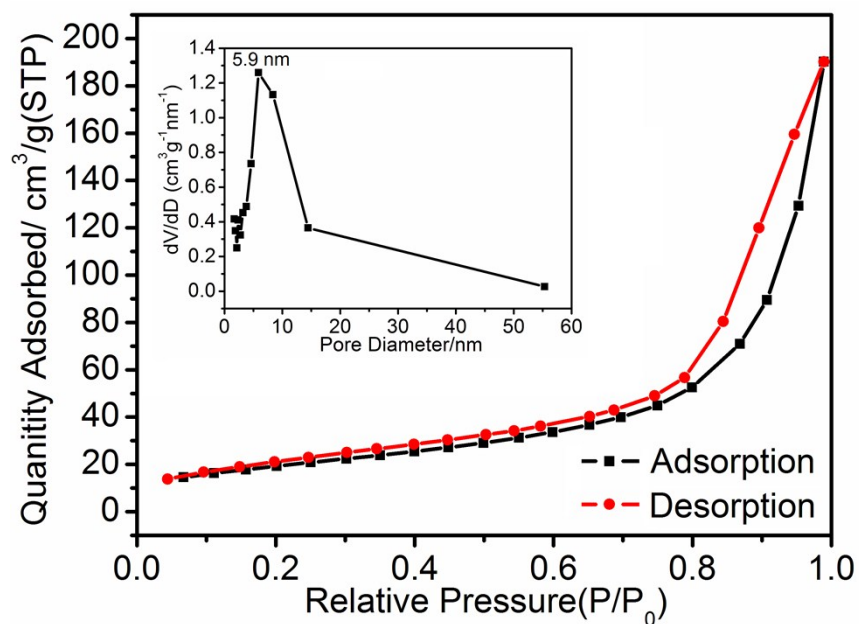

**Fig. S6.** N<sub>2</sub> adsorption-desorption isotherm of S-NiCo<sub>2</sub>O<sub>4</sub> (inset: BJH pore size distribution).

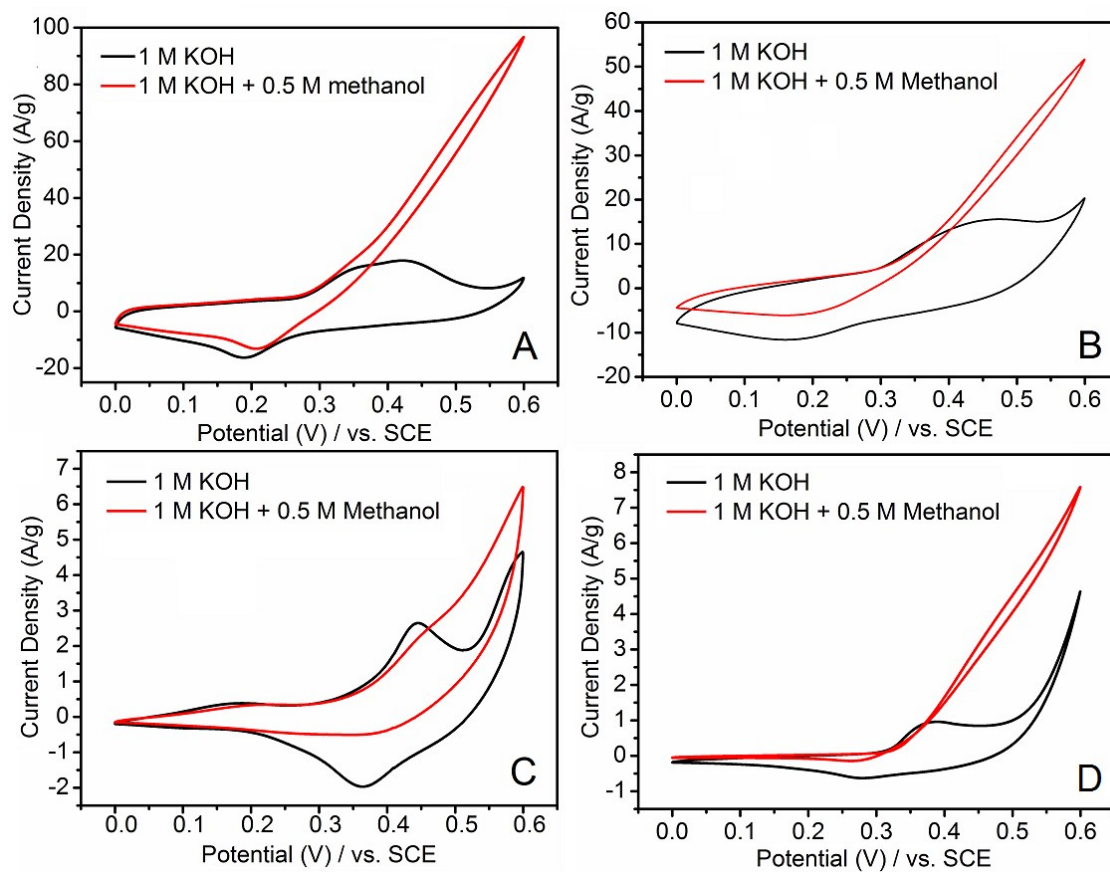

**Fig. S7.** CV curves of variously modified electrodes in 1 M KOH with and without 0.5 M methanol at a scan rate of  $50 \text{ mV s}^{-1}$ : (A) H-NiCo<sub>2</sub>O<sub>4</sub> (B) S-NiCo<sub>2</sub>O<sub>4</sub>, (C) Co<sub>3</sub>O<sub>4</sub>, and (D) NiO.

**Table S1.** The methanol electro-oxidation performance of different NiCo<sub>2</sub>O<sub>4</sub> electrodes using SCE as reference electrode at a scanning rate of 50 mV/s.

| Samples                                             | Morphology                                                                       | Loading/<br>mg/ cm <sup>2</sup> | Working<br>electrode                        | Current<br>density<br>at 0.6 V<br>/ A/g | Onset<br>potential/<br>V | Cycle<br>time/<br>Retention/<br>s/% | Cycles/<br>Retention /<br>cycle/% <sup>a</sup> | Refs.     |
|-----------------------------------------------------|----------------------------------------------------------------------------------|---------------------------------|---------------------------------------------|-----------------------------------------|--------------------------|-------------------------------------|------------------------------------------------|-----------|
| H-NiCo <sub>2</sub> O <sub>4</sub>                  | 3D hollow spheres consisting of porous ultrathin nanosheets                      | 1.41                            | GCE                                         | 96                                      | 0.27                     | 1000/80                             | 500/79(90)                                     | This Work |
| S-NiCo <sub>2</sub> O <sub>4</sub>                  | 3D solid spheres consisting of porous ultrathin nanosheets                       | 1.41                            | GCE                                         | 52                                      | 0.32                     | 1000/70                             | -                                              | This Work |
| Hollow NiCo <sub>2</sub> O <sub>4</sub>             | Urchin-like hollow spheres consisting of nanorods                                | 1.41                            | GCE                                         | 24.5                                    | ~ 0.30                   | 1000/84                             | 500/85                                         | 1         |
| Solid NiCo <sub>2</sub> O <sub>4</sub>              | Urchin-like solid spheres consisting of nanorods                                 | 1.41                            | GCE                                         | 12.5                                    | ~ 0.33                   | 1000/56                             | -                                              | 1         |
| NiCo <sub>2</sub> O <sub>4</sub> <sup>b</sup>       | Nanosphere-like NiCo <sub>2</sub> O <sub>4</sub> consisting of porous nanosheets | -                               | Ni Foam                                     | 65                                      | 0.37                     | 1000/84                             | 500/89(97)                                     | 2         |
| NiCo <sub>2</sub> O <sub>4</sub> <sup>b,c</sup>     | Porous nanostructured nanoparticles                                              | ~5.0                            | Stainless Steel mesh (5mg/cm <sup>2</sup> ) | 98 mA/cm <sup>2</sup>                   | 0.39                     | 1800/77                             | -                                              | 3         |
| NiCo <sub>2</sub> O <sub>4</sub> /SS <sup>b,c</sup> | Nanosheets grown on stainless steel (SS)                                         | ~1.0                            | NiCo <sub>2</sub> O <sub>4</sub> /SS        | 54                                      | 0.42                     | 1000/94                             | 1000/82(91)                                    | 4         |

<sup>a</sup> Data in blanket is obtained by replacing the electrolyte after recycling.

<sup>b</sup> Hg/HgO reference electrode is employed.

<sup>c</sup> With a scanning rate of 10 mV/s.

**Table S2.** Equivalent circuit parameters of electro-oxidation of methanol on the oxide electrodes in KOH solution obtained from Fig. 8.

| Electrode                          | Impedimetric parameters (1M KOH)   |                        |                                       |                                                         |
|------------------------------------|------------------------------------|------------------------|---------------------------------------|---------------------------------------------------------|
|                                    | $R_s$ ( $\Omega$ cm <sup>2</sup> ) | C (F/cm <sup>2</sup> ) | $R_{ct}$ ( $\Omega$ cm <sup>2</sup> ) | $W, Y_0$ ( $\Omega$ s <sup>0.5</sup> cm <sup>-2</sup> ) |
| H-NiCo <sub>2</sub> O <sub>4</sub> | 1.24                               | 1.38E-5                | 1.26                                  | 0.0409                                                  |
| S-NiCo <sub>2</sub> O <sub>4</sub> | 1.35                               | 1.89E-4                | 1.70                                  | 0.0359                                                  |
| Co <sub>3</sub> O <sub>4</sub>     | 1.81                               | 2.51E-5                | 3.72                                  | 0.0042                                                  |
| NiO                                | 1.94                               | 3.82E-5                | 100.1                                 | 0.0016                                                  |

  

| Electrode                          | Impedimetric parameters (1M KOH with 0.5M methanol) |                        |                                       |                                                         |
|------------------------------------|-----------------------------------------------------|------------------------|---------------------------------------|---------------------------------------------------------|
|                                    | $R_s$ ( $\Omega$ cm <sup>2</sup> )                  | C (F/cm <sup>2</sup> ) | $R_{ct}$ ( $\Omega$ cm <sup>2</sup> ) | $W, Y_0$ ( $\Omega$ s <sup>0.5</sup> cm <sup>-2</sup> ) |
| H-NiCo <sub>2</sub> O <sub>4</sub> | 1.30                                                | 1.53E-5                | 1.47                                  | 0.0355                                                  |
| S-NiCo <sub>2</sub> O <sub>4</sub> | 1.51                                                | 7.98E-5                | 2.42                                  | 0.0152                                                  |
| Co <sub>3</sub> O <sub>4</sub>     | 1.88                                                | 2.64E-5                | 8.79                                  | 0.0023                                                  |
| NiO                                | 1.97                                                | 3.80E-5                | 116.2                                 | 0.0014                                                  |



**Table S3.** Morphology, synthetic method and specific capacitance of different NiCo<sub>2</sub>O<sub>4</sub> electrodes.

| Sample Morphology                                                                                     | Synthesis method                                             | Loading /mg             | Specific capacitance | Rate performance                                        | Capacity retention        | Refs.     |
|-------------------------------------------------------------------------------------------------------|--------------------------------------------------------------|-------------------------|----------------------|---------------------------------------------------------|---------------------------|-----------|
| 3D NiCo <sub>2</sub> O <sub>4</sub> hollow microspheres consisting of mesoporous ultrathin nanosheets | Template-free solvothermal method                            | ~6                      | 1701F/g,1A/g         | 1180 F/g, 10 A/g<br>1046 F/g, 15 A/g<br>893 F/g, 20 A/g | 78.2% (10A/g, 1000cycles) | This work |
| NiCo <sub>2</sub> O <sub>4</sub> core-in- double-shell hollow spheres                                 | Self-templated                                               | –                       | 1141F/g,1A/g         | 784 F/g, 15 A/g                                         | 94.7% (5A/g, 4000cycles)  | 5         |
| hollow NiCo <sub>2</sub> O <sub>4</sub> flower-like microstructures                                   | fast microwave-assisted hydrothermal route                   | –                       | 387F/g,1A/g          | 248 F/g, 10 A/g                                         | 96.1% (1A/g, 5000cycles)  | 6         |
| Uniform mesoporous hollow NiCo <sub>2</sub> O <sub>4</sub> sub-microspheres                           | Template(SiO <sub>2</sub> )-engaged synthesis                | 8 (mg/cm <sup>2</sup> ) | 678F/g,1A/g          | 540 F/g, 10 A/g                                         | 87% (10A/g, 3500cycles)   | 7         |
| Hierarchical mesoporous spinel NiCo <sub>2</sub> O <sub>4</sub>                                       | PVP-assisted hydrothermal method                             | –                       | 1619F/g,2A/g         | 571 F/g, 10 A/g                                         | 94.7% (6A/g, 1000cycles)  | 8         |
| Novel 3D flower-like NiCo <sub>2</sub> O <sub>4</sub> hierarchitectures                               | Solvothermal synthesis with PVP                              | –                       | 1191F/g,1A/g         | 755 F/g, 10 A/g                                         | 78.4% (1A/g, 1200cycles)  | 9         |
| 3D hierarchical flower-shaped NiCo <sub>2</sub> O <sub>4</sub> microsphere                            | Rapid template-free microwave-assisted heating reflux method | 3                       | 1006F/g,1A/g         | 726 F/g, 20 A/g                                         | 93.2% (8A/g, 1000cycles)  | 10        |

## References

- 1 X. Y. Yu, X. Z. Yao, T. Luo, Y. Jia, J. H. Liu and X. J. Huang, *ACS Appl. Mater. Interfaces*, 2014, 6, 3689-3695.
- 2 L. Gu, L. Qian, Y. Lei, Y. Y. Wang, J. Li, H. Y. Yuan, D. X. Xiao, *J. Power Sources*, 2014, 261, 317-323.
- 3 R. Ding, L. Qi, M.J. Jia, H.Y. Wang, *Electrochimica Acta*, 2013, 113, 290–301.
- 4 L. Qian, L. Gu, L. Yang, H. Y. Yuan and D. Xiao, *Nanoscale*, 2013, 5, 7388-7396.
- 5 L. F. Shen, L. Yu, X. Y. Yu, X. G. Zhang, and X. W. Lou, *Angew. Chem. Int. Ed.* 2015, 54, 1868 -1872.
- 6 H. Zheng, Y. Ni, F. Wan and X. Ma, *RSC Adv.*, 2015, 5, 31558–31565.
- 7 C. Yuan, J. Li, L. Hou, J. Lin, G. Pang, L. Zhang, L. Lian and X. Zhang, *RSC Adv.*, 2013, 3, 18573-18578.
- 8 Y. F. Zhang, M. Z. Ma, J. Yang, H. Q. Su, W. Huang and X. C. Dong, *Nanoscale*, 2014, 6, 4303-4308.
- 9 C. H. An, Y. J. Wang, Y. N. Huang, Y. N. Xu, C. C. Xu, L. F. Jiao and H. T. Yuan, *CrystEngComm*, 2014, 16, 385-392.
- 10 Y. Lei, J. Li, Y. Y. Wang, L. Gu, Y. F. Chang, H. Y. Yuan, and D. Xiao, *ACS Appl. Mater. Interfaces*, 2014, 6, 1773-1780.
